# Supplementary material
Source: MDPI journal article supplement (https://www.mdpi.com/2071-1050/9/10/1912)
Supplement: s1 [file s1]

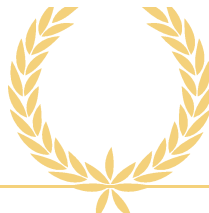

We certify that the following article

**Mapping Fine Spatial Resolution Precipitation from TRMM Precipitation  
Datasets Using an Ensemble Learning Method based on MODIS optical  
products over China**

**Xiaodan Zhao, Wenlong Jing \*, Pengyan Zhang \***

has undergone English language editing by MDPI. The text has been checked for correct use of grammar and common technical terms, and edited to a level suitable for reporting research in a scholarly journal.

MDPI uses experienced, native English speaking editors. Full details of the editing service can be found at

► [www.mdpi.com/authors/english](http://www.mdpi.com/authors/english).

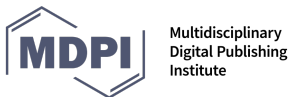

Basel, October 2017

A handwritten signature in blue ink, consisting of a series of loops and a long horizontal stroke.

Martyn Rittman, Ph.D.  
English Editing Manager
